# Supplementary material for: Emission-tunable silver clusters constrained within EMT zeolite
Source: Royal Society of Chemistry journal article supplement (doi:10.1039/d3tc03859a), 2023-01-01
Supplement: d3tc03859a1.pdf [file d3tc03859a1.pdf]

# Emission-tunable silver clusters constrained within EMT zeolite achieved by PEG400

Jinping Yuan<sup>1</sup>, Qianrui Li<sup>1</sup>, Chunmei Yue<sup>1</sup>, Na Wang<sup>1</sup>, Peng Li<sup>1\*</sup> and Huanrong Li<sup>1\*</sup>

<sup>1</sup> School of Chemical Engineering and Technology, Hebei University of Technology, GuangRong Dao 8, Hongqiao District, Tianjin 300130, China.

Corresponding author: E-mail: lihuanrong@hebut.edu.cn; lipeng@hebut.edu.cn

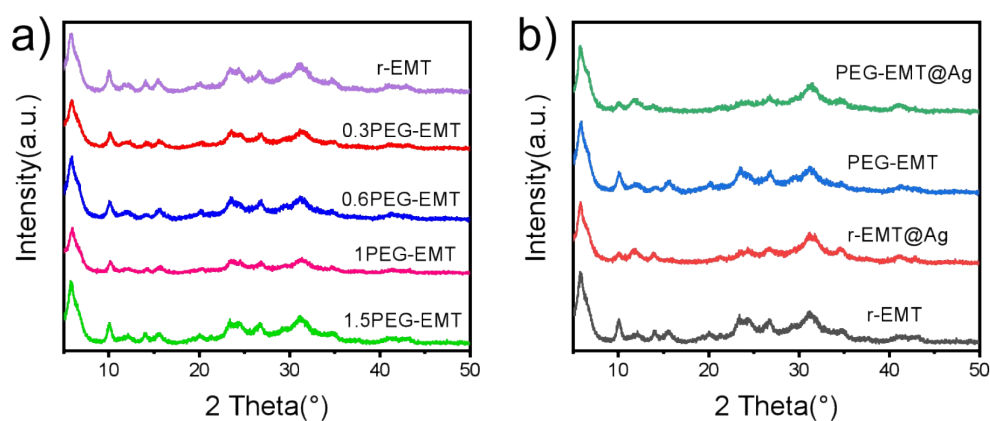

**Figure S1.** a) XRD patterns of EMT zeolites modified with different proportions of PEG400, b) XRD patterns of r-EMT@Ag and PEG-EMT@Ag.

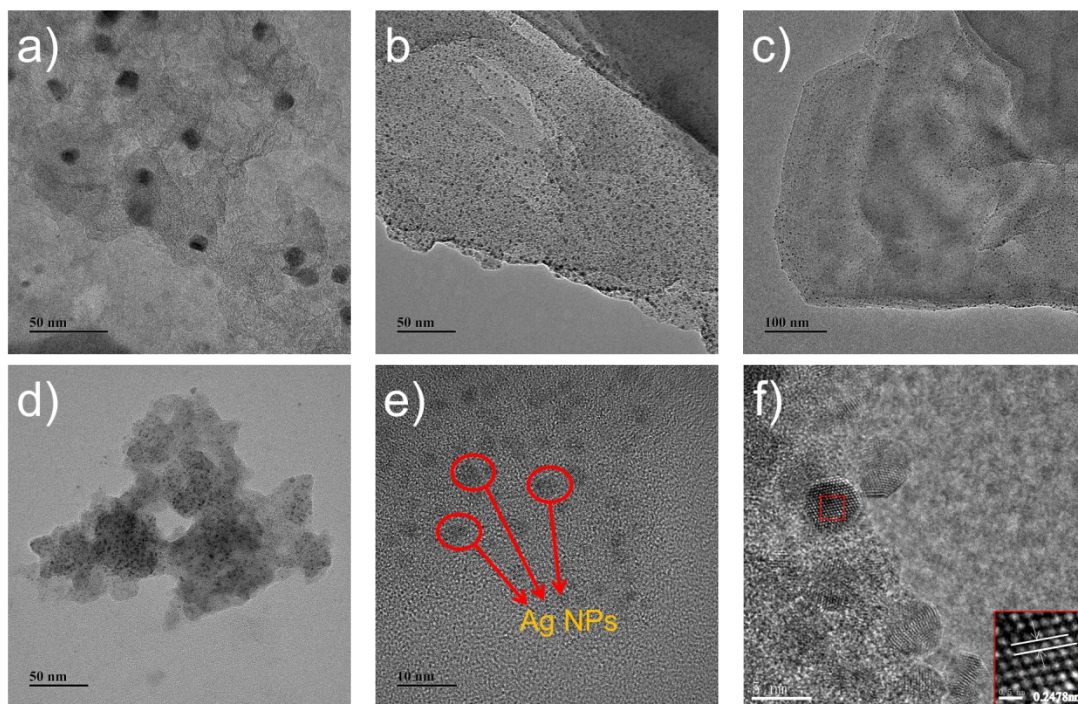

**Figure S2.** TEM images of a) PEG-EMT, b-c) PEG-EMT@Ag, d) r-EMT@Ag. HRTEM images of e) Ag nanoparticles from PEG-EMT@Ag, f) PEG-EMT@Ag.

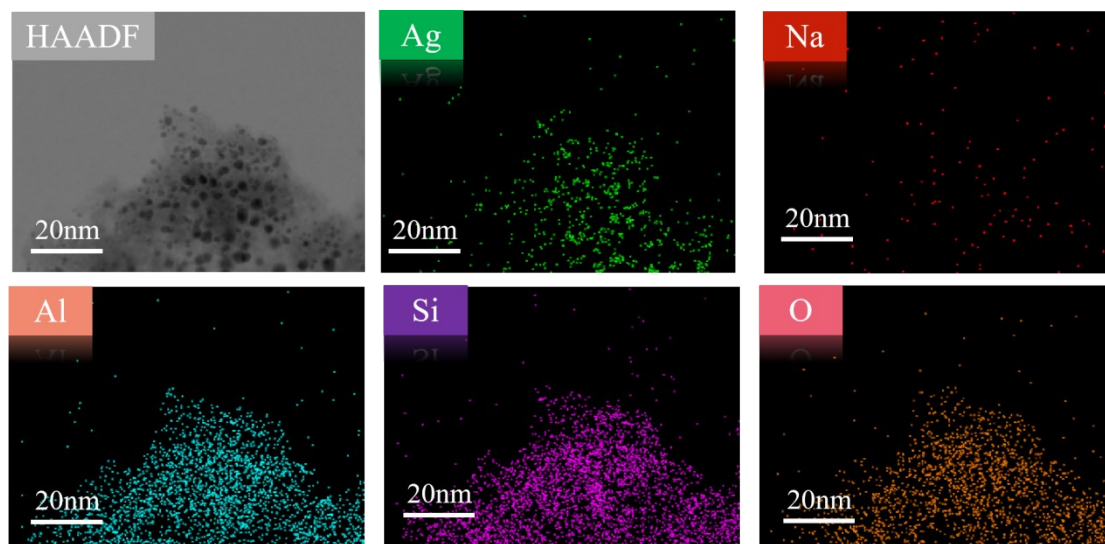

**Figure S3.** Elemental mapping images of r-EMT@Ag.

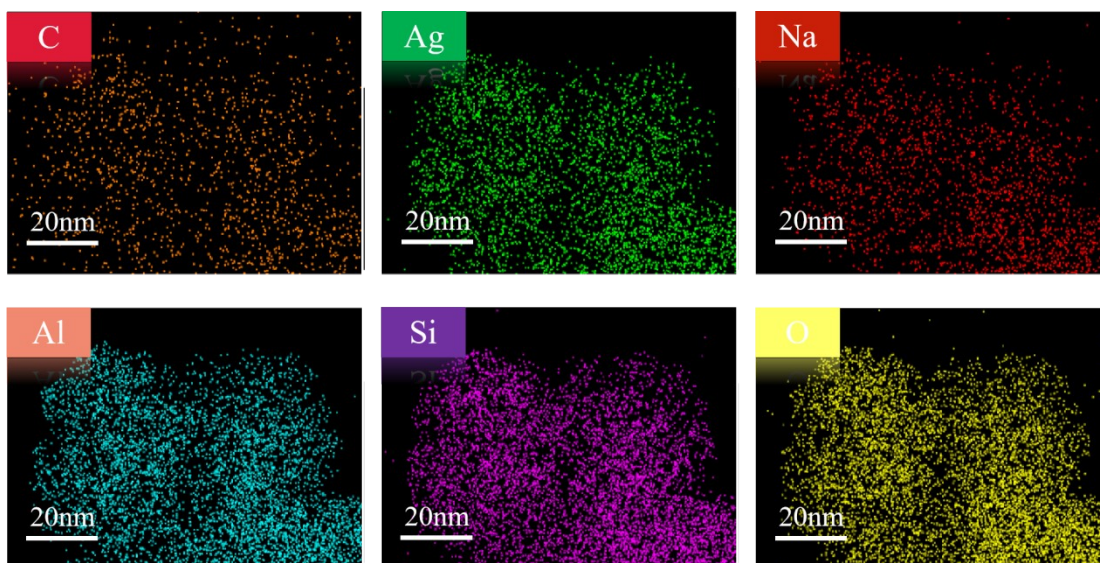

**Figure S4.** Elemental mapping images of PEG-EMT@Ag.

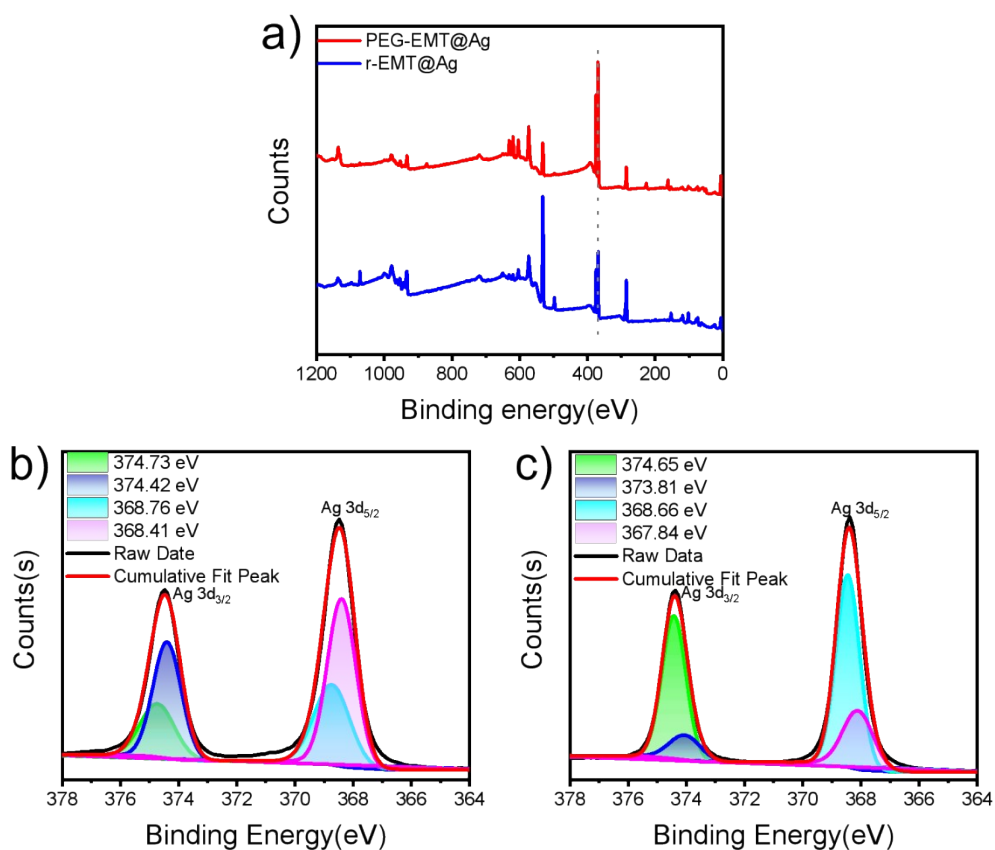

**Figure S5.** a) XPS spectra for r-EMT@Ag and PEG-EMT@Ag, Gaussian fitting of Ag based on the XPS spectra of b) r-EMT@Ag, c) PEG-EMT@Ag.

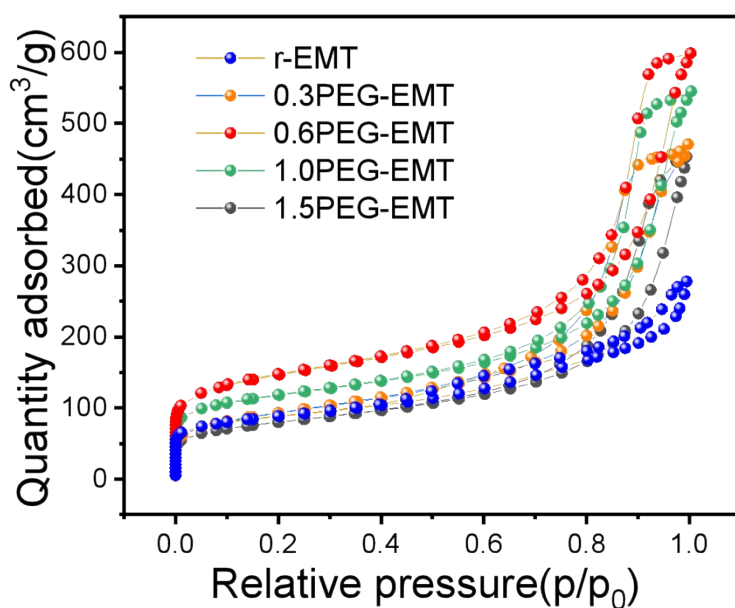

Figure

e S6. The N<sub>2</sub> sorption isotherm of r-EMT and nPEG-EMT zeolite.

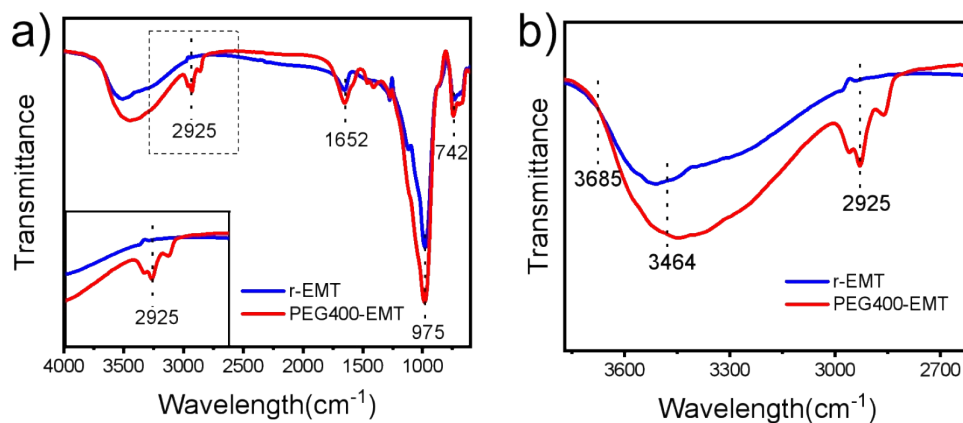

Figure S7. a) FT-IR spectra of r-EMT and PEG400-EMT. b) Enlarged images of an imaginary location in part a).

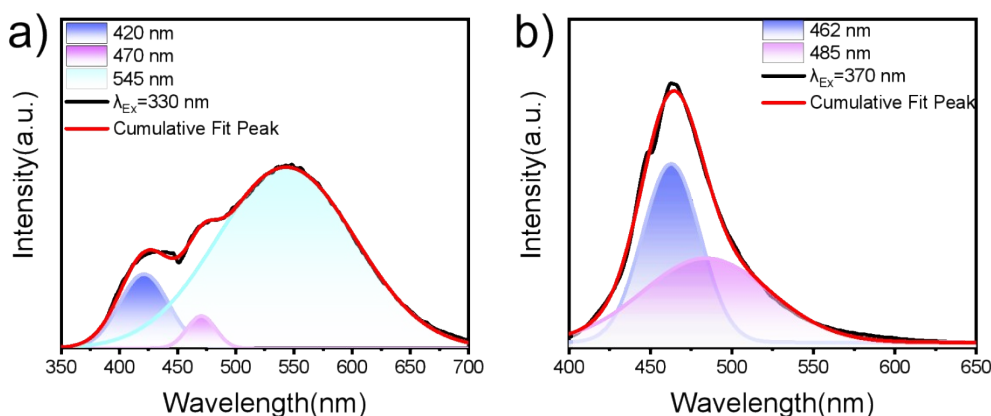

**Figure S8.** Gaussian peak fitting of fluorescence emission map a) r-EMT@Ag, b) PEG-EMT@Ag.

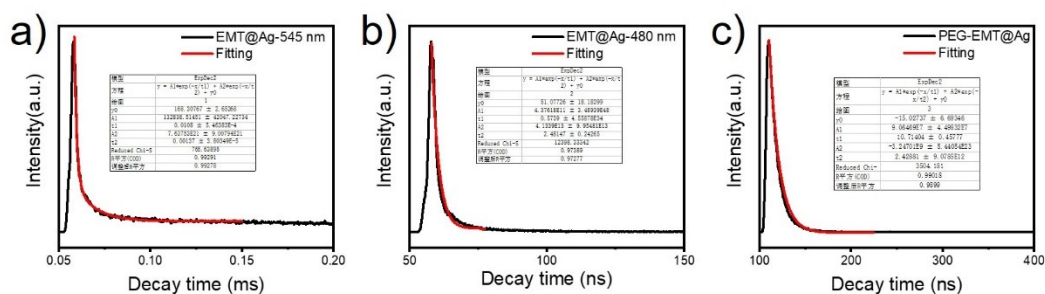

**Figure S9.** Emission decay time measurements of silver-loaded composites (a) r-EMT@Ag recorded at 545 nm, (b) r-EMT@Ag recorded at 480 nm and (c) PEG-EMT@Ag recorded at 460 nm.

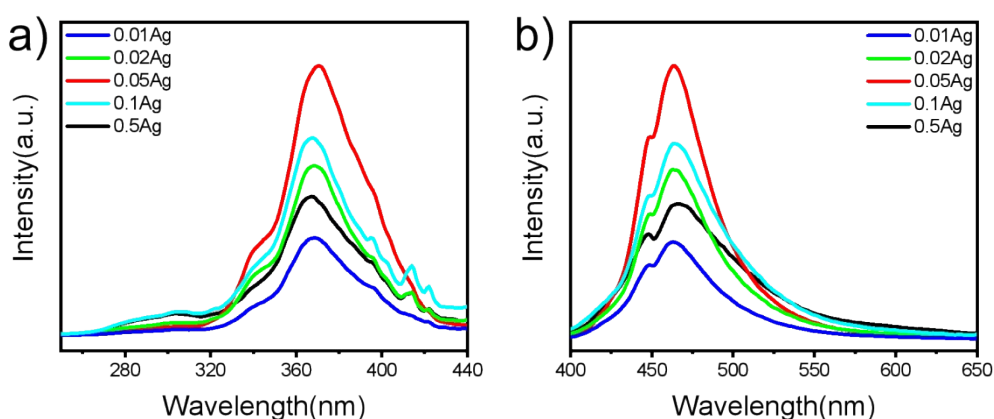

**Figure S10.** a) Excitation spectra of 0.6PEG-EMT@mAg ( $m=0.01, 0.02, 0.05, 0.1, 0.5M$ ). b) Emission spectra of 0.6PEG-EMT@mAg ( $m=0.01, 0.02, 0.05, 0.1, 0.5M$ ) (excitation at 370 nm, emission at 460 nm)

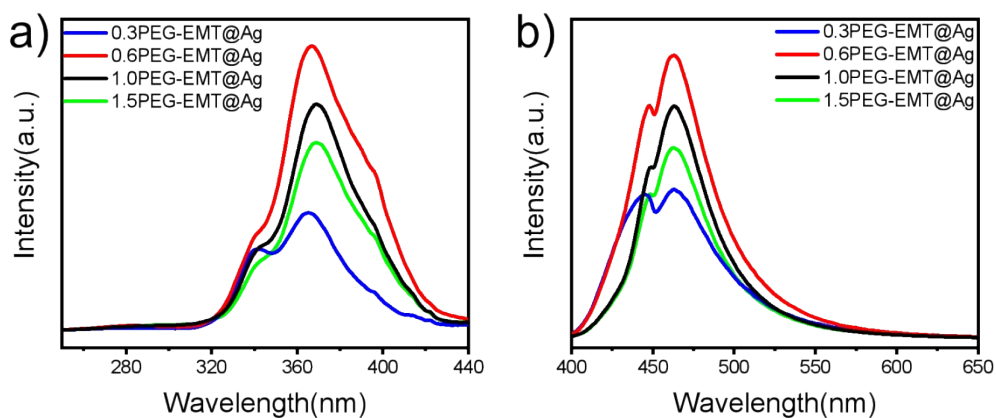

**Figure S11.** a) Excitation spectra of nPEG-EMT@0.05Ag (n=0.3, 0.6, 1.0, 1.5). b) Emission spectra of nPEG-EMT@0.05Ag (n=0.3, 0.6, 1.0, 1.5) (excitation at 370 nm, emission at 460 nm)

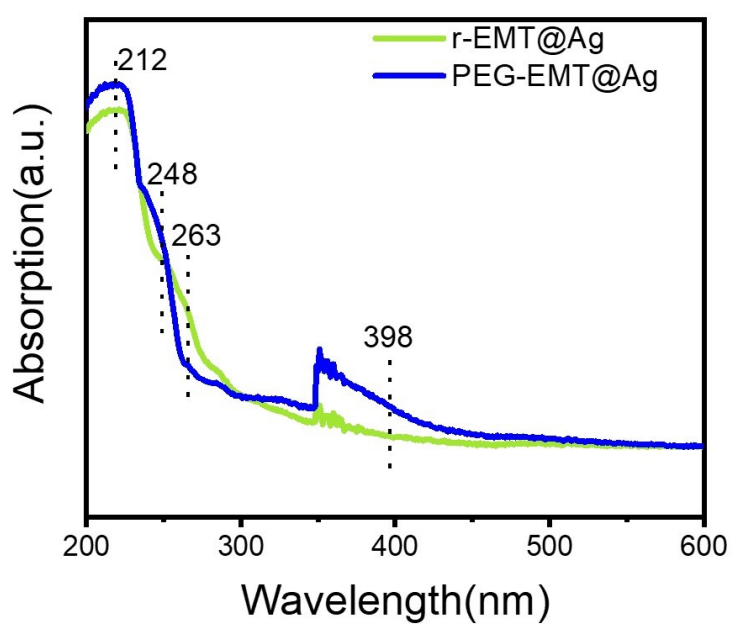

**Figure S12.** The UV-Vis absorbance spectra of r-EMT@Ag and PEG-EMT@Ag.

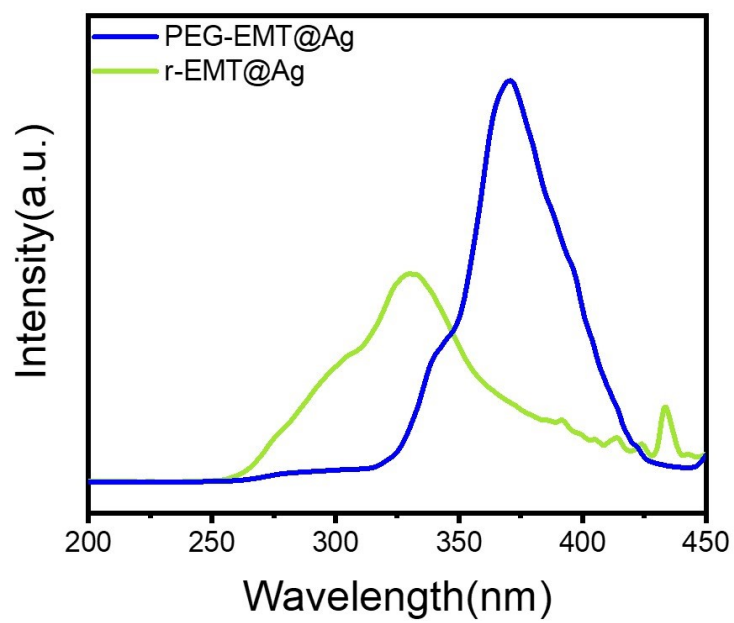

**Figure S13.** Excitation spectra of r-EMT@Ag and PEG-EMT@Ag

**Table S1.** The surface and bulk compositions of different materials

| Name       | Si/%  | Al/%  | C/%   | O/%   | Na/% | Ag/%  | Ag <sup>+</sup><br>exchange<br>rate/% | Ag<br>(Bulk<br>content)/% |
|------------|-------|-------|-------|-------|------|-------|---------------------------------------|---------------------------|
| r-EMT      | 16.14 | 15.38 | 25.53 | 36.88 | 6.07 | 0     | 0                                     | 0                         |
| r-EMT@Ag   | 11.98 | 11.6  | 33.1  | 37.24 | 2.11 | 3.97  | 65.24                                 | 9.453                     |
| PEG-EMT    | 14.93 | 14.12 | 25.55 | 39.02 | 6.38 | 0     | 0                                     | 0                         |
| PEG-EMT@Ag | 12.06 | 11.39 | 35.34 | 26.24 | 1.15 | 13.82 | 81.98                                 | 13.944                    |

Surface contents by XPS data. Bulk contents by ICP data.

**Table S2.** Pore structure parameters of r-EMT and PEG-EMT zeolite

| Sample     | S <sub>BET</sub> (m <sup>2</sup> /g) | E <sub>external</sub> (m <sup>2</sup> /g) | V <sub>Micropore</sub> (cm <sup>3</sup> /g) | V <sub>Total</sub> (cm <sup>3</sup> /g) |
|------------|--------------------------------------|-------------------------------------------|---------------------------------------------|-----------------------------------------|
| r-EMT      | 293.6242                             | 182.0599                                  | 0.056587                                    | 0.429721                                |
| 0.3PEG-EMT | 333.0901                             | 245.8087                                  | 0.036206                                    | 0.718857                                |
| 0.6PEG-EMT | 445.5775                             | 278.2705                                  | 0.105900                                    | 0.905865                                |
| 1.0PEG-EMT | 391.6399                             | 231.0730                                  | 0.081104                                    | 0.824188                                |
| 1.5PEG-EMT | 286.2630                             | 194.6308                                  | 0.038639                                    | 0.701232                                |
